# Supplementary material
Source: PubMed Central journal article supplement (PMC2749488)
Supplement: NIHMS131997-supplement-supplementary.pdf [file NIHMS131997-supplement-supplementary.pdf]

**A direct and non-destructive approach to determine the folding structure of the I-motif DNA  
secondary structure by NMR**

Jixun Dai, Attila Ambrus, Laurence H. Hurley, Danzhou Yang\*

**Supporting Information**

## METHODS

**Sample preparation.** The DNA oligonucleotides were synthesized as described previously<sup>1-3</sup>. 6 % <sup>15</sup>N-cytosine or <sup>15</sup>N-thymine phosphoramidites were used for site-specific C- or T-labeled DNA synthesis. The uniformly <sup>15</sup>N-labeled cytosine and thymine phosphoramidites were purchased from Cambridge Isotope Laboratories. The NMR samples contained ~ 0.5mM DNA oligonucleotides in 95% H<sub>2</sub>O and 5% D<sub>2</sub>O. Each DNA sample was adjusted to pH 5.5 by using NaOH or HCl. No buffer was used in sample preparation. The final salt concentration was about 5 mM.

**NMR experiments.** NMR experiments were performed on a Bruker AVANCE 600 MHz spectrometer using a 5mm TXI gradient probe head. All spectra were acquired at 7°C, unless otherwise specified. Identifications of cytosine imino protons in site-specific labeled oligonucleotides were performed by one-dimensional <sup>15</sup>N-filtered experiments<sup>1-4</sup>. The GE-JRSE HMQC were used to measure <sup>15</sup>N-filtered spectra of Cytosine imino protons<sup>5,6</sup>. To avoid signal loss due to saturation transfer, the jump-return spin-echo and gradient pulses were used to suppress the water peak. The jump-return delay time was tuned to have the maximum intensity at the frequencies of the peaks of interest around 15 ppm. The gradient pulses were applied for 1 ms with a strength of 6 G/cm. The 2JNH transfer time was adjusted to take into account of the relaxation loss. The carrier frequencies were set at water peak in the <sup>1</sup>H dimension and at 210 ppm in the <sup>15</sup>N dimension. The repetition delay was 1.5 s.

The imino proton in a C<sup>+</sup>-C base pair has one-bond coupling to the N3 atoms of the two base-paired cytosines and can be readily detected by 1D <sup>15</sup>N-filtered HMQC experiments, using the site-specifically <sup>15</sup>N labeled DNA sample at each cytosine. The detection of an imino peak of a site-specifically C-labeled DNA by 1D <sup>15</sup>N-filtered HMQC experiments between 15-16 ppm, a region characteristics of C<sup>+</sup>-C base pairs in I-motif structures, will indicate that this cytosine is involved in

the C<sup>+</sup>-C base pairing. The cytosine imino proton which is not involved in the C<sup>+</sup>-C base pairing will not be detected in this region. As the two cytosines of a C<sup>+</sup>-C base pair share one imino H3 hydrogen, the imino proton involved in the hydrogen bonding distributes equally between the two base-paired cytosines. Through the <sup>1</sup>H – <sup>15</sup>N one bond coupling, the two C-labeled DNA samples at each of the two base-paired cytosines will give rise to a <sup>1</sup>H resonance peak in the 1D HMQC experiments at the same location.

#### References:

1. Dai, J. X.; Carver, M.; Punchihewa, C.; Jones, R. A.; Yang, D. Z., *Nucleic Acids Research* **2007**, 35, (15), 4927-4940.
2. Ambrus, A.; Chen, D.; Dai, J.; Bialis, T.; Jones, R. A.; Yang, D. Z., *Nucl. Acids. Res.* **2006**, 34, (9), 2723-2735.
3. Dai, J.; Dexheimer, T. S.; Chen, D.; Carver, M.; Ambrus, A.; Jones, R. A.; Yang, D. Z., *J Am Chem Soc* **2006**, 128, (4), 1096 -1098.
4. Phan, A. T.; Patel, D. J., *J Am Chem Soc* **2002**, 124, (7), 1160-1161.
5. Sklenar, V.; Bax, A., *J Magnetic Resonance* **1987**, 74, (3), 469-479.
6. Szewczak, A. A.; Kellogg, G. W.; Moore, P. B., *FEBS Lett.* **1993**, 327, (3), 261-4.

**Figure S1.** The cytosine-imino proton region of the 1D  $^1\text{H}$  NMR of site-specific 5mC-substituted Py23 DNA samples at 7 °C.

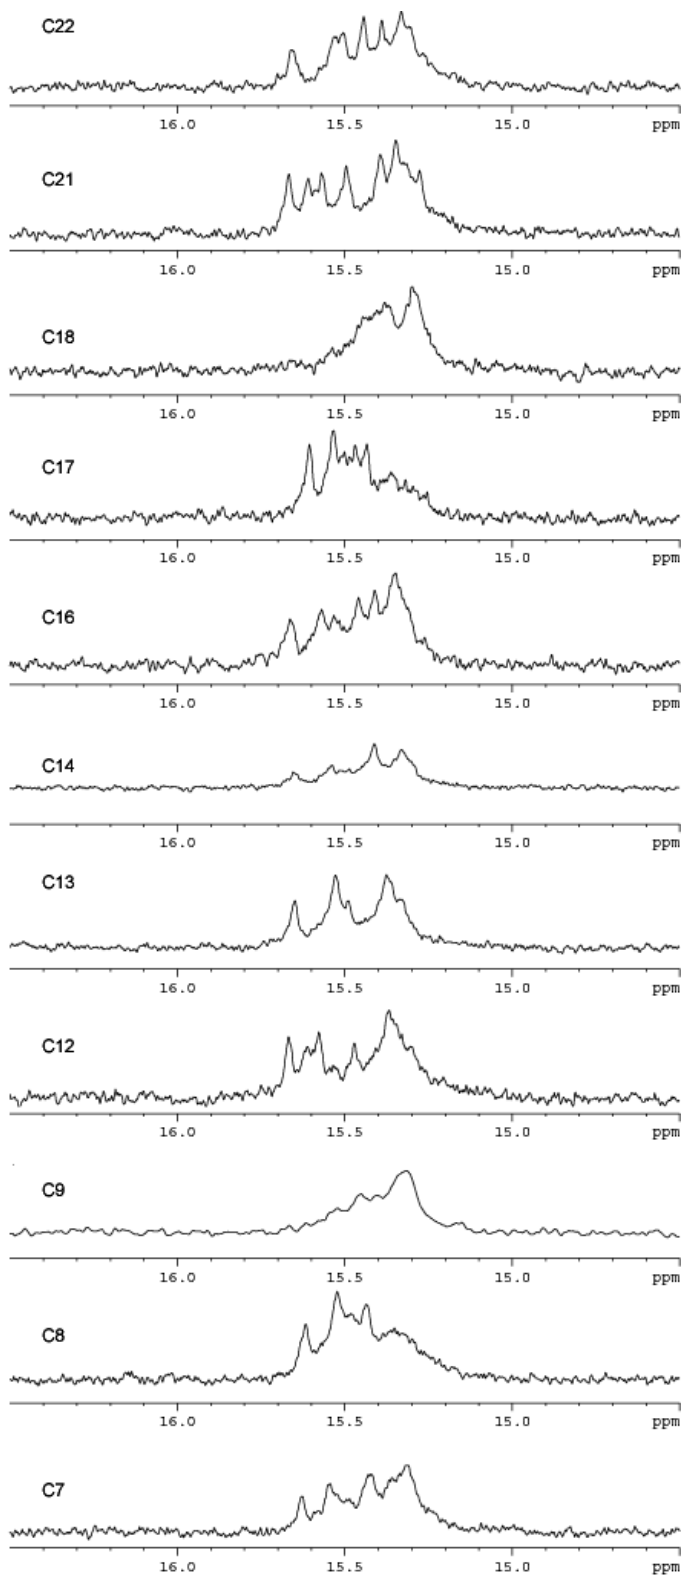

Figure S1.
